# Supplementary figures and images for: (S)-Naproxen based novel chiral reagent for C–N bond formation: enantioseparation of some β-blockers, determination of absolute configuration and elution order of diastereomers
Source: Royal Society of Chemistry journal article supplement (doi:10.1039/c5ra07519j), 2015-01-01

## Supplementary information

### IR spectra of CDR

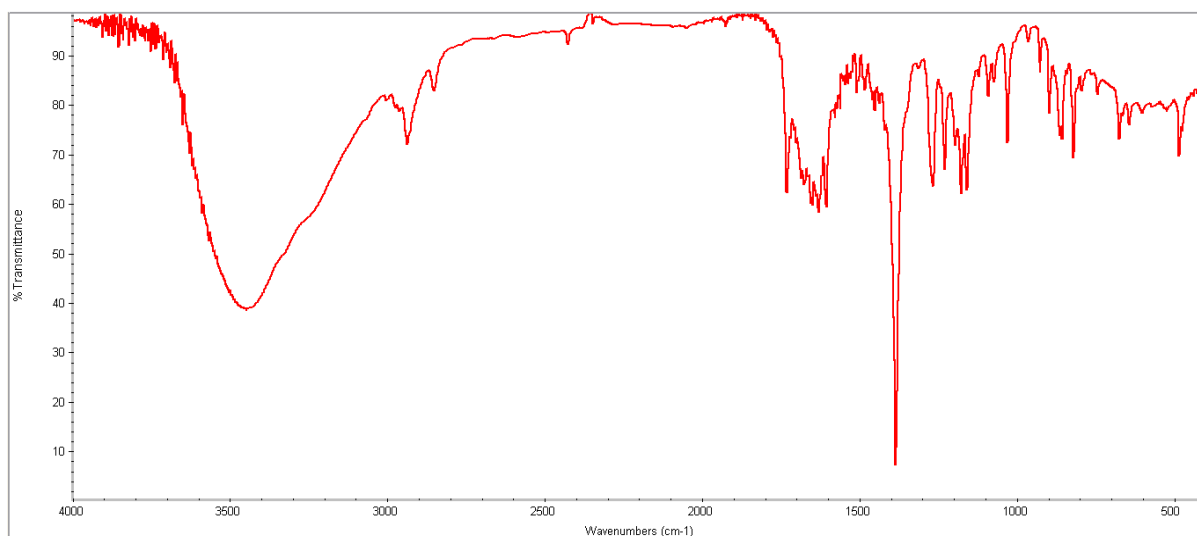

### <sup>1</sup>H NMR of CDR

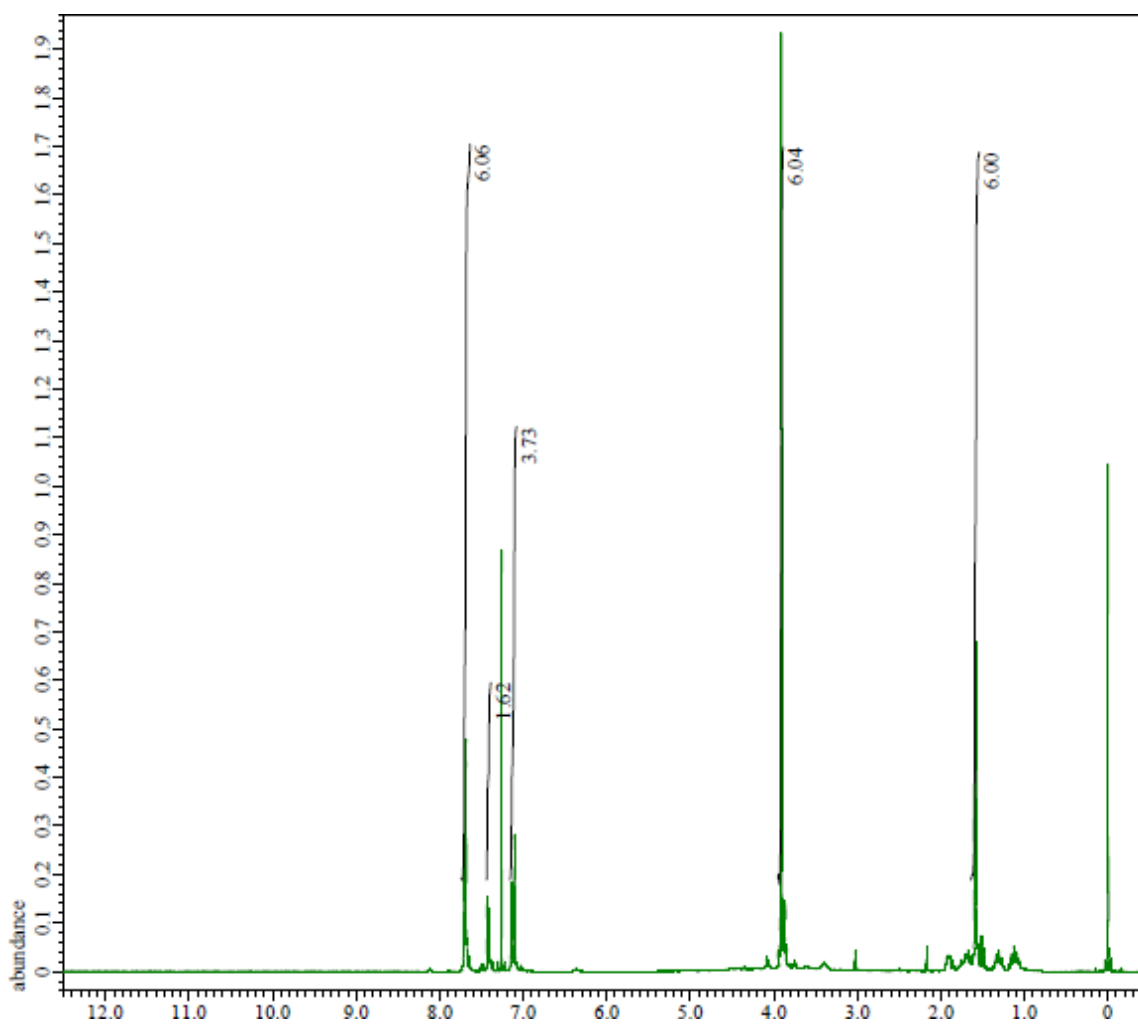

Supplement: c5ra07519j1.pdf [file c5ra07519j1.pdf]
